# Supplementary material for: Microplastics in Sediment and Surface Water of West Dongting Lake and South Dongting Lake: Abundance, Source and Composition
Source: MDPI journal article supplement (doi:10.3390/ijerph15102164), 2018-10-01
Supplement: s1 [file s1]

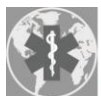

**Supplementary Material:**

**Figure S1.** Typical marcoplastics and mesoplastics collected in this study.

**Table S1.** Abundance comparison with other freshwater areas (Surface water).

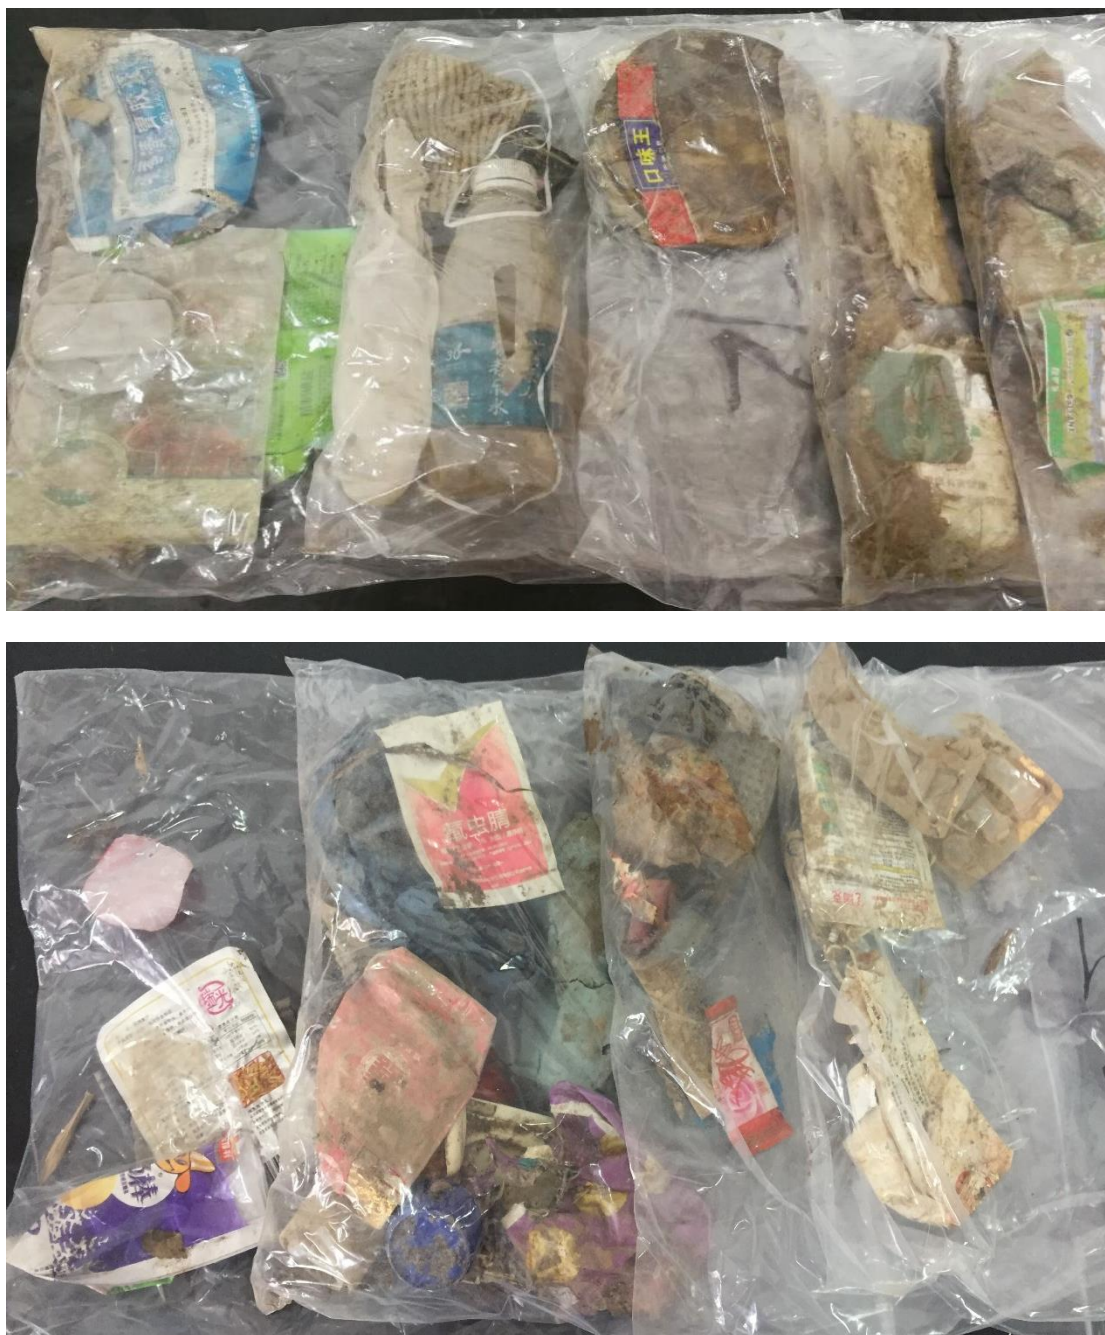

**Figure S1.** Typical macroplastics and mesoplastics collected in this study.

**Table S1.** Abundance comparison with other freshwater areas (Surface water).

| Surface Water                    | Location                | Abundance (Items/m <sup>3</sup> ) | Reference  |
|----------------------------------|-------------------------|-----------------------------------|------------|
| Los Angeles River                | USA                     | 22–12,932                         | [1]        |
| Tamar Estuary                    | UK                      | 0.028                             | [2]        |
| Yangtze River Estuary            | China                   | 500–10,200                        | [3]        |
| Oujiang Estuary                  | China                   | 100–4100                          | [4]        |
| Seine River                      | France                  | 3–108                             | [5]        |
| Great Lakes tributaries          | North America           | 0.05–32                           | [6]        |
| Lake Bolsena                     | Italy                   | 0.82–4.42                         | [7]        |
| Lake Chiusi                      | Italy                   | 2.68–3.36                         | [7]        |
| Taihu Lake                       | China                   | 3400–25,800                       | [8]        |
| Bei Lake                         | China                   | 7800–10,050                       | [9]        |
| Wu Lake                          | China                   | 1160–2380                         | [10]       |
| Three Gorges Dam                 | China                   | 1594–12,611                       | [11]       |
| Rhine River and Meuse River      | Netherlands and Germany | 100–18,700                        | [12]       |
| Middle-Lower Yangtze River Basin | China                   | 500–3100                          | [13]       |
| Antua River                      | Portugal                | 58–1265                           | [14]       |
| Hong Lake                        | China                   | 1250–4650                         | [15]       |
| East Dongting Lake               | China                   | 900–2800                          | [15]       |
| West Dongting Lake               | China                   | 433–2217                          | This study |
| South Dongting Lake              | China                   | 367–2316                          | This study |

**Table S2.** Abundance comparison with other freshwater areas (Sediment).

| Sediment               | Location | Abundance (Items/kg) | Reference  |
|------------------------|----------|----------------------|------------|
| Lagoon of Venice       | Italy    | 672–2175             | [16]       |
| Rhine River            | Germany  | 228–3763             | [17]       |
| Taihu Lake             | China    | 11–234.6             | [8]        |
| Lake Chiusi            | Italy    | 205–266              | [7]        |
| Lake Ontario           | Canada   | 20–27,830            | [18]       |
| Beijiang River         | China    | 178–544              | [9]        |
| Huangpu River          | China    | 410–1600             | [19]       |
| Edgbaston Pool         | UK       | 250–300              | [20]       |
| Yangtze River Esuary   | China    | 20–340               | [21]       |
| River Thames Tributary | UK       | 18.5–66              | [22]       |
| Antua River            | Portugal | 18–619               | [14]       |
| Three Gorges Dam       | China    | 25–300               | [11]       |
| West Dongting Lake     | China    | 320–480              | This study |
| South Dongting Lake    | China    | 200–1150             | This study |

## References

1. Moore, C.J.; Lattin, G.L.; Zellers, A. Quantity and type of plastic debris flowing from two urban rivers to coastal waters and beaches of Southern California. *Journal of Integrated Coastal Zone Management* 2011; 11: 65-73.
2. Sadri SS, Thompson RC. On the quantity and composition of floating plastic debris entering and leaving the Tamar Estuary, Southwest England. *Marine Pollution Bulletin* 2014; 81: 55-60.
3. Zhao S, Zhu L, Wang T, et al. Suspended microplastics in the surface water of the Yangtze Estuary System, China: First observations on occurrence, distribution. *Marine Pollution Bulletin* 2014; 86: 562-568.
4. Zhao S, Zhu L, Li D. Microplastic in three urban estuaries, China. *Environmental Pollution* 2015; 206: 597-604.
5. Dris R, Gasperi J, Rocher V, et al. Microplastic contamination in an urban area: a case study in Greater Paris. *Environmental Chemistry* 2015; 12: 592.
6. Baldwin AK, Corsi SR, Mason SA. Plastic Debris in 29 Great Lakes Tributaries: Relations to Watershed Attributes and Hydrology. *Environmental Science & Technology* 2016; 50: 10377-10385.
7. Fischer EK, Paglialonga L, Czech E, et al. Microplastic pollution in lakes and lake shoreline sediments-A case study on Lake Bolsena and Lake Chiuse (central Italy). *Environmental Pollution* 2016; 213: 648-657.
8. Su L, Xue Y, Li L, et al. Microplastics in Taihu Lake, China. *Environmental Pollution* 2016; 216: 711-719.
9. Wang J, Peng J, Tan Z, et al. Microplastics in the surface sediments from the Beijiang River littoral zone: Composition, abundance, surface textures and interaction with heavy metals. *Chemosphere* 2017; 171: 248-258.
10. Wang W, Ndungu AW, Li Z, et al. Microplastics pollution in inland freshwaters of China: A case study in urban surface waters of Wuhan, China. *Science of The Total Environment* 2017; 575: 1369-1374.
11. Di M, Wang J. Microplastics in surface waters and sediments of the Three Gorges Reservoir, China. *Science of The Total Environment* 2018; 616-617: 1620-1627.
12. Leslie HA, Brandsma SH, van Velzen MJM, et al. Microplastics en route: Field measurements in the Dutch river delta and Amsterdam canals, wastewater treatment plants, North Sea sediments and biota. *Environment International* 2017; 101: 133-142.
13. Su L, Cai H, Kolandhasamy P, et al. Using the Asian clam as an indicator of microplastic pollution in freshwater ecosystems. *Environmental Pollution* 2018; 234: 347-355.
14. Rodrigues MO, Abrantes N, Gonçalves FJM, et al. Spatial and temporal distribution of microplastics in water and sediments of a freshwater system (Antuã River, Portugal). *Science of The Total Environment* 2018; 633: 1549-1559.
15. Wang W, Yuan W, Chen Y, et al. Microplastics in surface waters of Dongting Lake and Hong Lake, China. *Science of The Total Environment* 2018; 633: 539-545.
16. Vianello A, Boldrin A, Guerriero P, et al. Microplastic particles in sediments of Lagoon of Venice, Italy: First observations on occurrence, spatial patterns and identification. *Estuarine, Coastal and Shelf Science* 2013; 130: 54-61.
17. Klein S, Worch E, Knepper TP. Occurrence and Spatial Distribution of Microplastics in River Shore Sediments of the Rhine-Main Area in Germany. *Environmental Science & Technology* 2015; 49: 6070-6076.
18. Ballent A, Corcoran PL, Madden O, et al. Sources and sinks of microplastics in Canadian Lake Ontario nearshore, tributary and beach sediments. *Marine Pollution Bulletin* 2016; 110: 383-395.
19. Peng G, Xu P, Zhu B, et al. Microplastics in freshwater river sediments in Shanghai, China: A case study of risk assessment in mega-cities. *Environmental Pollution* 2018; 234: 448-456.
20. Vaughan R, Turner SD, Rose NL. Microplastics in the sediments of a UK urban lake. *Environmental Pollution* 2017; 229: 10-18.
21. Peng G, Zhu B, Yang D, et al. Microplastics in sediments of the Changjiang Estuary, China. *Environmental Pollution* 2017; 225: 283-290.
22. Horton AA, Svendsen C, Williams RJ, et al. Large microplastic particles in sediments of tributaries of the River Thames, UK – Abundance, sources and methods for effective quantification. *Marine Pollution Bulletin* 2017; 114: 218-226.
